# Supplementary material for: Machine Learning–Based Identification of Target Groups for Thrombectomy in Acute Stroke
Source: PubMed Central journal article supplement (PMC10159968; doi:10.1007/s12975-022-01040-5), 2022-06-07
Supplement: 12975_2022_1040_MOESM4_ESM.pdf [file 12975_2022_1040_MOESM4_ESM.pdf]

### Supplemental Figure 3

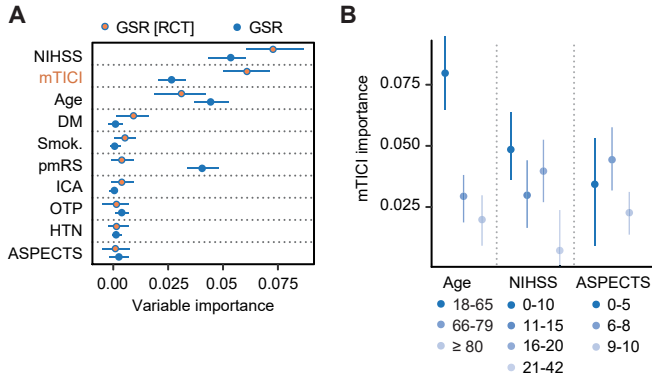

**mTICI importance for outcome prediction using a generalized linear model. (A)** Selecting real-world patients that comply with RCT inclusion criteria increased the importance value of the mTICI score for outcome prediction compared to an unselected real-world cohort (GSR). **(B)** mTICI importance values for outcome prediction were higher in younger patients, with lower NIHSS scores, and low-to-mid ASPECTS when compared to other subgroups of the respective strata. GSR, German Stroke Registry; RCT, randomized controlled trial; mTICI, modified Thrombolysis in Cerebral Infarction; pmRS, premorbid modified Rankin Scale; HTN, hypertension; ICA, internal carotid artery; NIHSS, National Institutes of Health Stroke Scale; ASPECTS, Alberta Stroke Program Early CT Score; DM, diabetes mellitus; Smok., smoking; OTP, onset to puncture time.
