# Supplementary material for: Machine Learning–Based Identification of Target Groups for Thrombectomy in Acute Stroke
Source: PubMed Central journal article supplement (PMC10159968; doi:10.1007/s12975-022-01040-5), 2022-06-07
Supplement: 12975_2022_1040_MOESM5_ESM.pdf [file 12975_2022_1040_MOESM5_ESM.pdf]

## Supplemental Figure 4

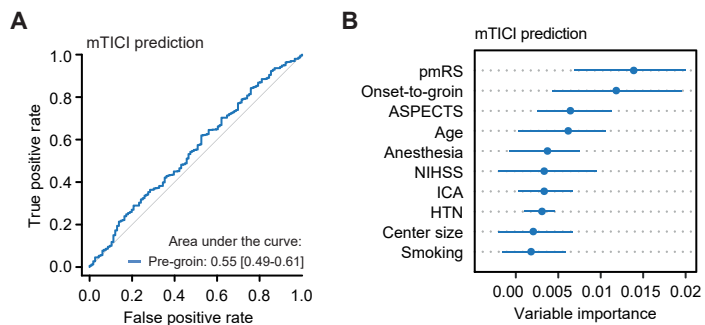

**Pre-groin information does not predict reperfusion grade.** Cumulative (A) and individual importance of pre-groin variables for predicting the final reperfusion grade mTICI (B) in the GSR. mTICI, modified Thrombolysis in Cerebral Infarction; pmRS, pre-morbid modified Rankin Scale; HTN, hypertension; ICA, internal carotid artery; IVT, intravenous thrombolysis; M2, second segment of the middle cerebral artery; NIHSS, National Institutes of Health Stroke Scale; ASPECTS, Alberta Stroke Program Early CT Score.
